# Supplementary material for: Vernicia fordii leaf extract inhibited anthracnose growth by downregulating reactive oxygen species (ROS) levels in vitro and in vivo
Source: PeerJ. 2024 Jul 22;12:e17607. doi: 10.7717/peerj.17607 (PMC11271649; doi:10.7717/peerj.17607)
Supplement: Supplemental Information 2 [file peerj-12-17607-s002.xlsx]

## Sheet: Sheet1
Fig 2D	Spot sizing analysis for defining C. oleifera lesion pathogenicity
	Flowers of V. fordii	Leaves of V. fordii	Shell of V. fordii	Control
	0.2	0.068	0.1785	0.302
	0.18	0.078	0.187	0.388
	0.22	0.046	0.148	0.301
Fig 2E	Colony diameter alteration(mm2)
	Trigonelline			Stachydrine			Betaine			O-Phosphocholine			Control
	21	21.5	22	20	22	22.5	32.5	31	33.5	33	34	34.4	44.5	46	45.5
Fig 2F	Lesion size modifications
	Trigonelline	Stachydrine	Betaine	O-Phosphocholine	Control
	0.14	0.059	0.063	0.171	0.315
	0.175	0.064	0.065	0.179	0.328
	0.2	0.07	0.067	0.216	0.339
