# Supplementary material for: Vernicia fordii leaf extract inhibited anthracnose growth by downregulating reactive oxygen species (ROS) levels in vitro and in vivo
Source: PeerJ. 2024 Jul 22;12:e17607. doi: 10.7717/peerj.17607 (PMC11271649; doi:10.7717/peerj.17607)
Supplement: Supplemental Information 3 [file peerj-12-17607-s003.xlsx]

## Sheet: Sheet1
AKP
0µg/mL	0.063	0.06	0.059
100µg/mL	0.067	0.07	0.073
200µg/mL	0.078	0.079	0.074
400µg/mL	0.094	0.093	0.089
600µg/mL	0.115	0.105	0.114
Extracellular conductivity
0µg/mL	0.54	0.47	0.63
100µg/mL	0.65	0.66	0.57
200µg/mL	0.67	0.68	0.77
400µg/mL	0.81	0.87	0.78
600µg/mL	0.83	0.88	0.8
