# Supplementary material for: Vernicia fordii leaf extract inhibited anthracnose growth by downregulating reactive oxygen species (ROS) levels in vitro and in vivo
Source: PeerJ. 2024 Jul 22;12:e17607. doi: 10.7717/peerj.17607 (PMC11271649; doi:10.7717/peerj.17607)
Supplement: Supplemental Information 4 [file peerj-12-17607-s004.xlsx]

## Sheet: Sheet1
MDA
0µg/mL	1.9	2.01	1.83
100µg/mL	2.333	2.506	2.31
200µg/mL	2.81	2.799	2.934
400µg/mL	3.96	3.866	3.955
600µg/mL	4.748	4.123	4.453
ROS
0µg/mL	41.47	43.97	33.96
100µg/mL	55.49	62.5	63.51
200µg/mL	68.01	75.53	72.52
400µg/mL	70.52	77.03	65.01
600µg/mL	75.03	80.54	76.03
