# Supplementary material for: Vernicia fordii leaf extract inhibited anthracnose growth by downregulating reactive oxygen species (ROS) levels in vitro and in vivo
Source: PeerJ. 2024 Jul 22;12:e17607. doi: 10.7717/peerj.17607 (PMC11271649; doi:10.7717/peerj.17607)
Supplement: Supplemental Information 5 [file peerj-12-17607-s005.xlsx]

## Sheet: Sheet1
	0µg/mL			100µg/mL			200µg/mL			400µg/mL			600µg/mL
HAC1	1.53891	1.64502	1.55011	1.80771	3.42582	1.17591	0.056836	0.0426458	0.0401102	0.0982588	0.0813287	0.084635	0.435492	0.405984	0.405296
MKK1	0.721489	0.782923	0.718155	2.79286	3.89062	1.37525	0.172383	0.136605	0.140609	0.286376	0.168701	0.239614	2.34407	1.98459	1.4484
RAB7	27.4487	20.7761	26.8656	150.946	194.717	83.4492	1.84761	1.59452	1.66078	0.564768	0.438074	0.476825	5.74738	4.59321	3.62956
VAM7	6.87751	4.81898	6.24909	10.4086	18.8959	8.2641	0.175581	0.139863	0.17251	0.148465	0.0869126	0.127165	12.815	11.3097	10.6955
VPS39	4.99862	4.6669	5.80237	19.1487	21.3561	14.9039	0.14877	0.105718	0.123646	0.105834	0.0834477	0.105294	5.14477	3.94355	3.10709
